# Supplementary material for: The Plant Growth-Promoting Potential of Halotolerant Bacteria Is Not Phylogenetically Determined: Evidence from Two Bacillus megaterium Strains Isolated from Saline Soils Used to Grow Wheat
Source: MDPI journal article supplement (doi:10.3390/microorganisms11071687), 2023-06-28
Supplement: s1 [file s1]

## Supplementary data

**Table S1** – Effect of increasing salinity and bacterial inoculation on wheat seedlings' water content (%). # indicates that for the control (no bacterial strain) under 250 mM of NaCl, all plants died. Values are the mean  $\pm$  1SE (n = 7 replicates).

| <b>[NaCl]</b> | <b>0 mM</b> | <b>150 mM</b> | <b>250 mM</b> |
|---------------|-------------|---------------|---------------|
| Control       | 92 $\pm$ 1  | 96 $\pm$ 1    | #             |
| S1            | 92 $\pm$ 1  | 97 $\pm$ 0    | 98 $\pm$ 0    |
| S2            | 93 $\pm$ 1  | 98 $\pm$ 1    | 97 $\pm$ 0    |
| S3            | 92 $\pm$ 1  | 98 $\pm$ 0    | 98 $\pm$ 0    |
| S4            | 93 $\pm$ 1  | 96 $\pm$ 1    | 97 $\pm$ 0    |

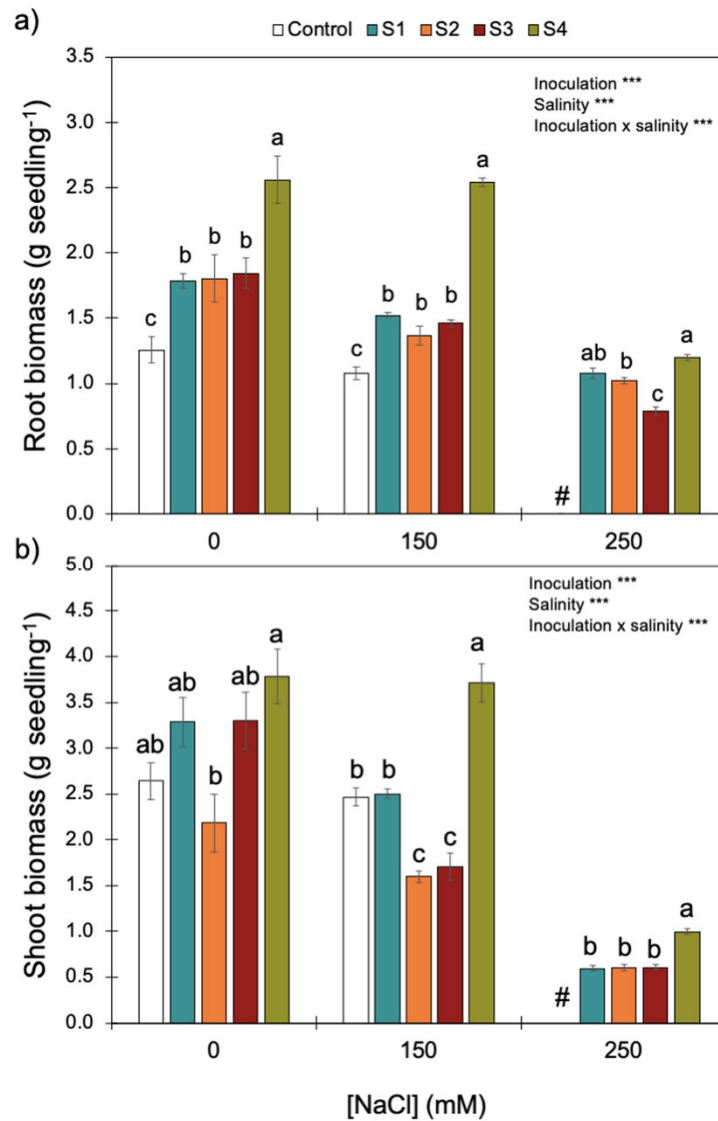

**Figure S1** - Effect of increasing salinity and bacterial inoculation on wheat seedlings' root (**a**) and shoot biomass (**b**). \*\*\* shows significant effects ( $p < 0.01$ ). Different letters show significant differences between bacterial strains for the same salinity level ( $p < 0.05$ ). # indicates that for the control (no bacterial strain) under 250 mM of NaCl, all plants died. Bars are the mean  $\pm$  1SE ( $n = 7$  replicates).

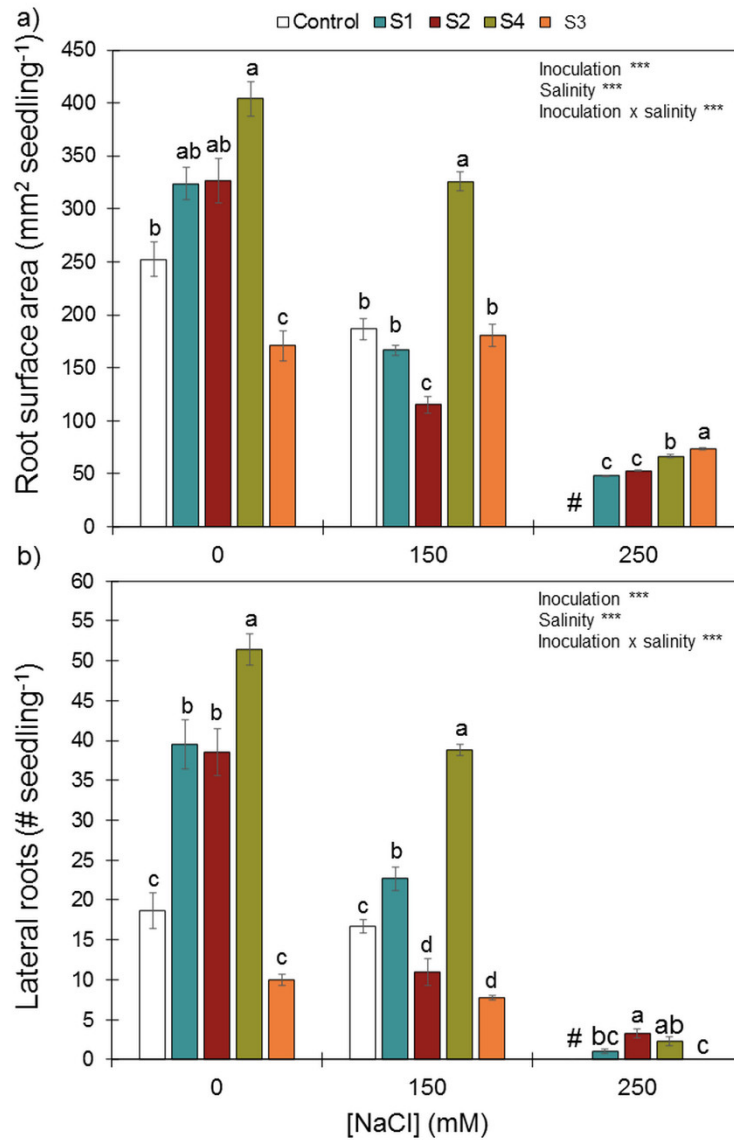

**Figure S2** - Effect of increasing salinity and bacterial inoculation on the length of the wheat seedlings' root surface area (**a**), and the number of lateral roots (**b**). \*\*\* shows significant effects ( $p < 0.01$ ). Different letters show significant differences between bacterial strains for the same salinity level ( $p < 0.05$ ). # indicates that for the control (no bacterial strain) under 250 mM of NaCl, all plants died. Bars are the mean  $\pm$  1SE (n = 7 replicates).

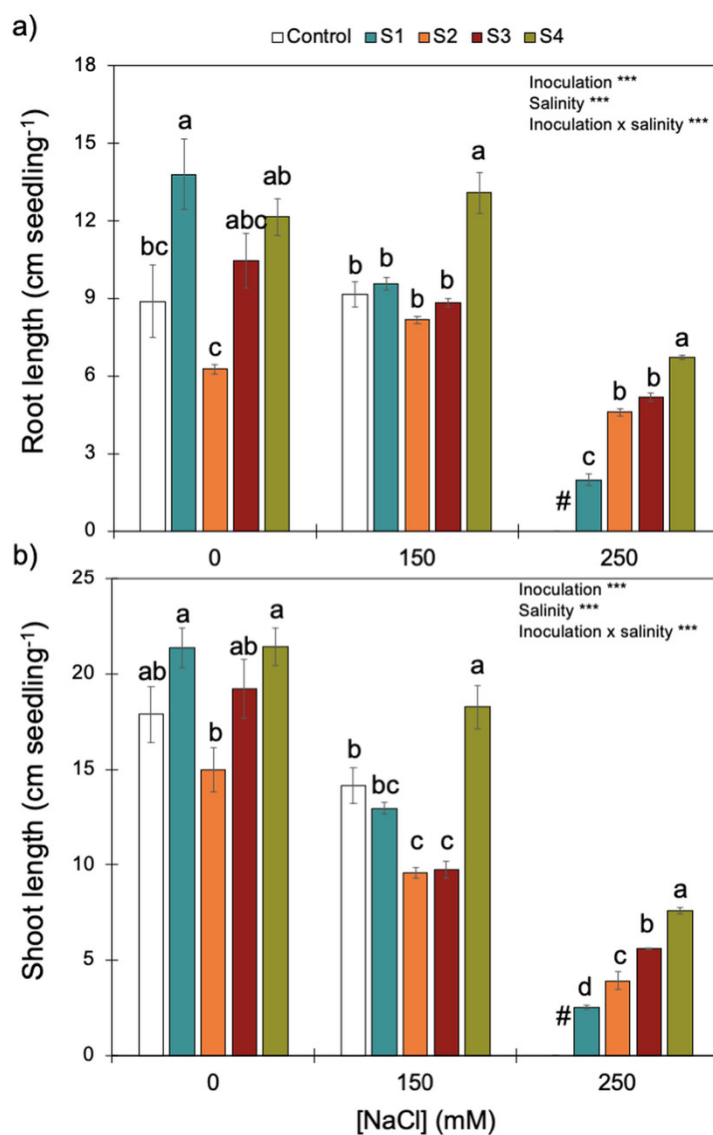

**Figure S3** - Effect of increasing salinity and bacterial inoculation on the length of wheat seedlings' root (a), and shoot (b). \*\*\* shows significant effects ( $p < 0.01$ ). Different letters show significant differences between bacterial strains for the same salinity level ( $p < 0.05$ ). # indicates that for the control (no bacterial strain) under 250 mM of NaCl, all plants died. Bars are the mean  $\pm$  1SE ( $n = 7$  replicates).
